# Supplementary material for: A Haystack Heuristic for Autoimmune Disease Biomarker Discovery Using Next-Gen Immune Repertoire Sequencing Data
Source: PubMed Central journal article supplement (PMC5509648; doi:10.1038/s41598-017-04439-5), 2017-07-13
Supplement: 41598_2017_4439_MOESM1_ESM.pdf [file 41598_2017_4439_MOESM1_ESM.pdf]

# **A Haystack Heuristic for Autoimmune Disease Biomarker Discovery Using Next-Gen Immune Repertoire Sequencing Data**

## Authors:

Leonard Apeltsin<sup>1</sup>, Shengzhi Wang<sup>1</sup>, H.-Christian von Büdingen<sup>1,\*</sup>, Marina Sirota<sup>3</sup>

## Affiliations:

<sup>1</sup> Department of Neurology, UCSF, San Francisco, 94158, USA; <sup>3</sup> Institute for Computational Health Sciences, UCSF, San Francisco, 94158, USA

\*Author for correspondence:

H.-Christian von Büdingen, MD  
Department of Neurology  
University of California, San Francisco  
San Francisco, CA 94158 - USA  
Email: Hans-Christian.vonBuedingen@ucsf.edu

## Supplementary Materials 1

This section discusses the use and selection of Positional Optimization Functions (POFs). We begin by first defining an atomic vector  $\mathbf{V}$  as tuple of values  $(\mathbf{T}, \mathbf{P})$ , where  $\mathbf{T}$  is a three-character triplet and  $\mathbf{P}$  is its preset position. Given any input triplet  $\mathbf{T}$ , we need to be able to transform it into a new atomic vector. This can be done by querying the database for matches to  $\mathbf{T}$  across all possible positions. From those results, we allocate motif  $\mathbf{Mx}$  to every match occurring at unique position  $\mathbf{x}$ . For each  $\mathbf{Mx}$ , we calculate the position-specific match counts  $\mathbf{a}_x$  and  $\mathbf{b}_x$ . These variables must next be processed by some specified POF. The POF will scan all instances of  $\mathbf{x}$  in order to determine an optimal position  $\mathbf{oP}$ , which will then be used to transform triplet  $\mathbf{T}$  into an atom vector  $(\mathbf{T}, \mathbf{oP})$ .

Our requirements for POF specification remain open-ended. We have tested several POFs in the implementation of the Heuristic. Our most basic POF is the A-optimization function, which scans motif matches at all  $\mathbf{x}$  positions in order to pinpoint the maximum possible  $\mathbf{a}_x$ . Effectively, A-optimization locates the triplet position that yields the maximum number of matches to category  $\mathbf{A}$  individuals. The Heuristic, as described in the paper, implements A-optimization.

An alternate optimization approach is combinatorial optimization (C-optimization), which minimizes  $(\mathbf{a}_x + \mathbf{b}_x - |\mathbf{A}|)^2$ . In this manner, C-optimization attempts to adjust the overall match counts so that they approximate the original number of category  $\mathbf{A}$  individuals. C-optimization is more convoluted than A-optimization; it is explicitly blind to whether selects for category  $\mathbf{A}$  or category  $\mathbf{B}$  individuals. Our purpose for implementing C-optimization was to test for Heuristic stability relative to the chosen POF.

We ran our Heuristic with A-optimization, as described in the paper. Afterwards, we reran the Heuristic with C-optimization in order to determine how a change of POF would influence DOM output. The DOMs discussed through C-optimization were identical to the DOMs discovered through A-optimization. Both techniques produced the Prime Motif, which we analyze in Section 3.2. From this, we concluded that the final Heuristic output is not exceedingly sensitive to POF specification.

## Supplementary Materials 2

Suppose that a given motif  $\mathbf{Mx}$  matches any patient with probability  $p_x$ . All matches of  $\mathbf{Mx}$  to unique patients are independent of each other. Thus, the probability the  $\mathbf{Mx}$  matches to  $m$  distinct patients is  $p_x^m$ . Conversely, the probability that  $\mathbf{Mx}$  does not match  $n$  distinct patients is  $(1-p_x)^n$ . Suppose we encounter  $t$  total patients,  $m$  of which match motif  $\mathbf{Mx}$ , and  $t-m$  of which do not. The probability of this occurring is  $P(p_x, m, t-m) = \binom{t}{m} (1-p_x)^{t-m} p_x^m$ .

Suppose we encounter Dom  $Dx$ , which matches any patient with probability  $p_x$ . The match to a of A total patients occurs with probability  $P(p_x, a, |A| - a) = \binom{|A|}{a} (1-p_x)^{|A|-a} p_x^a$ . Furthermore, because  $Dx$  is a DOM,  $b$  is equal to zero. The probability that all category  $B$  patients will fail to match  $Dx$  is  $P(p_x, 0, |B|) = (1-p_x)^{|B|}$ . It follows that the total probability of encountering DOM  $Dk$  is  $P(p_x, a, |A| - a) * P(p_x, 0, |B|)$ , which equals  $\binom{|A|}{a} (1-p_x)^{|A|-a} p_x^a (1-p_x)^{|B|}$ . That formula simplifies down to  $\binom{|A|}{a} (1-p_x)^{|A|+|B|-a} p_x^a$ .

We represent  $Pr(Mx, a)$  as the probability that a given motif  $Mx$  is a DOM with  $a$  total patients matches. Our calculations show that  $Pr(Mx, a) = \binom{|A|}{a} (1-p_x)^{|A|+|B|-a} p_x^a$ . All the variables in that formula may be quantifiably obtained, except for  $p_x$ . Variable  $p_x$  remains an unknown quantity that varies for each motif  $Mx$ . Though we are unable to determine an a priori value for  $p_x$ , we are able to calculate the  $p_x$  quantity that will maximize the value of  $Pr(Mx, a)$ . These calculations are discussed in the subsequent paragraph.

In order to maximize  $Pr(Mx, a)$ , we must maximize  $(1-p_x)^{|A|+|B|-a} p_x^a$  relative to  $p_x$ . This is equivalent to maximizing the function  $f(p) = (1-p)^x p^y$  relative to  $p$ . With some elementary calculus, it is trivial to show that  $\frac{df(p)}{dp} = y p^{y-1} (1-p)^x - x (1-p)^{x-1} p^y$ . When  $\frac{df(p)}{dp} = 0$ , equation may be solved for  $p$  to show that  $p = y/(x+y)$ . Setting  $p$  to  $y/(x+y)$  will maximize the value of  $f(p)$ . Consequently, setting  $p_x$  to equal  $a/(|A| + |B|)$  will maximize the value of  $Pr(Mx, a)$ . Thus, if variable  $w = a/(|A| + |B|)$  then  $|A|+|B| - a = a(1/w - 1)$ , and the maximum value of  $Pr(Mx, a)$  is equal to  $\binom{|A|}{a} (1-w)^{a(1/w-1)} w^a$ . Therefore,  $ML(a, |A|, |B|) = \binom{|A|}{a} (1-w)^{a(1/w-1)} w^a$ , where  $ML(a, |A|, |B|)$  represents the maximize possible likelihood that any motif will match  $a$  of  $|A|$  category  $A$  patients and zero of  $|B|$  category  $B$  patients.

## Supplementary Materials 3

### S3.1 Unequal Frequency Analysis When Category B Matches Hold a Higher Likelihood

Suppose that a given motif  $M$  matches to category  $A$  patients with probability  $p$ , and also matches to category  $B$  patients with probability  $p_2$ . If the ratio of  $p_2$  to  $p$  is  $n$ , then  $p_2 = np$ . Thus, if  $P(p, a, n, |A|, |B|)$  is the probability that  $M$  is a DOM with  $a$  matches given the variables  $p, n, |A|$ , and  $|B|$ , then  $P(a, n, p, |A|, |B|) = \binom{|A|}{a} (1-np)^{|B|} (1-p)^{|A|-a} p^a$ . We have already considered the instance where  $n = 1$ . Let us instead consider the case where  $n=g$  and  $g > 1$ . Under such circumstances,  $gp > p$ ,  $1-gp < 1-p$ ,  $(1-gp)^{|B|} < (1-p)^{|B|}$  and  $P(a, g, p, |A|, |B|) \leq P(a, 1, p, |A|, |B|)$ . As a result, the expected occurrence of a motif where  $n=g$  is less than the expected occurrence of a motif where  $n=1$ . Thus, if the  $Mev$  of a DOM is significantly less than one, then we can immediately conclude that  $n$  is not equal to  $g$  and that  $p_2$  is less than  $p$ .

### S3.2 Unequal Frequency Analysis When Category A Matches Hold a Higher Likelihood

Suppose that the heuristic searches through  $C$  total motifs and discovers  $w$  total DOMs. The  $Mev$  for each of the  $w$  DOMs is significantly below zero. From this, we conclude that the  $n$  probability ratio must be less than one within the DOM motifs. Our next goal is to determine the maximum allowable value for ratio  $n$ . To do so, we assume that  $C_2$  of the visited  $C$  motifs contain a probability ratio of  $n < 1$ . We may divide these  $C_2$  motifs into  $k$  different groups where every group  $j$  contains  $X_j$  motifs with probability ratio  $n_j$ . Thus,  $\sum_{j=1}^k X_j = C_2$ , where  $C_2 \leq C$ . If  $V(p, a, n, |A|, |B|) = \sum_{t=a}^{|A|} P(t, n, p, |A|, |B|)$  then  $X_j * V(p, a, n_j, |A|, |B|)$  is equal to the expected number of DOM motifs within group  $j$  that match at least  $a$  patients. Thus, if all our  $w$  DOM motifs match to  $m$  or more patients, then we can model the equation for expected DOM occurrence as  $\sum_{j=1}^k X_j * V(p, m, n_j, |A|, |B|) = w$ .

Let us assume that our  $k$  groups are ordered such that  $n_{j+1} > n_j$ . As a result,  $n_1$  represents the lowest-valued probability ratio among the  $k$  groups. It is trivial to show that as  $n_j$  decreases, the value of  $V(p, m, n_j, |A|, |B|)$  must increase. Thus,  $V(p, m, n_1, |A|, |B|) \geq V(p, m, n_j, |A|, |B|)$ . From this relationship, we may iteratively derive the following sequence of inequalities:

- 1)  $\sum_{j=1}^k X_j * V(p, m, n_1, |A|, |B|) \geq w$
- 2)  $V(p, m, n_1, |A|, |B|) * \sum_{j=1}^k X_j \geq w$
- 3)  $V(p, m, n_1, |A|, |B|) * C_2 \geq w$
- 4)  $C_2 \geq w / V(p, m, n_1, |A|, |B|)$
- 5)  $\ln(C_2) \geq \ln(w) - \ln(V(p, m, n_1, |A|, |B|))$
- 6)  $\ln(C_2) - \ln(C) \geq \ln(w) - \ln(V(p, m, n_1, |A|, |B|)) - \ln(C)$
- 7)  $1 \geq C_2 / C$
- 8)  $0 \geq \ln(C_2) - \ln(C)$
- 9)  $0 \geq \ln(w) - \ln(V(p, m, n_1, |A|, |B|)) - \ln(C)$
- 10)  $\ln(V(p, m, n_1, |A|, |B|)) + \ln(C) - \ln(w) \geq 0$

Let us assume that  $F(p, n_1) = \ln(V(p, m, n_1, |A|, |B|)) + \ln(C) - \ln(w)$ , where  $m, w, C, |A|, |B|$  are all constant values. An alternate function,  $M(n_1)$ , represents the maximum possible value of  $F(p, n_1)$  relative to a constant  $n_1$ . This maximum value is directly depended on the maximum value of  $V(p, m, n_1, |A|, |B|)$ , which we represent as function  $Vm(n_1)$ . Function  $Vm(n_1)$  may be solved numerically by applying a Golden Section Search to  $V(p, m, n_1, |A|, |B|)$ . Therefore,  $M(n_1) = \ln(Vm(n_1)) + \ln(C) - \ln(w)$ . Based our tenth inequality, we know that for any valid  $n_1$ , function  $M(n_1)$  must be greater than or equal to zero. We can also easily show that  $M(n_1)$  decreases as  $n_1$  increases in value. Thus, if  $r$  is a root for which  $M(r) = 0$ , then any for any  $x > r$ ,  $M(x) < 0$ . Effectively,  $r$  represents the maximum possible value of a valid  $n_1$ . By solving for  $r$ , we are able to state that  $p_2/p \leq r$ .

In this manner, we are able estimate the upper bound of the probability ratio for any discovered DOM motif. Given a DOM with parameters  $(m, w, C, |A|, |B|)$ , we solve for the root of  $M(n_1)$  using common numerical methods. The resulting solution for  $M(n_1) = 0$  will give us the maximum possible ratio of DOM match probabilities between category  $B$  and category  $A$  patients.

### S3.3 Running an Unequal Frequency Analysis on the MS Sequence Dataset

When implementing the Haystack Heuristic, we assigned **51** MS patients to Category  $A$ , and **46** Healthy Controls to Category  $B$ . Afterwards, the Heuristic traversed **2,743,571** total motifs and outputted **171** DOMs. Thus,  $M(n_1) = \ln(Vm(n_1)) + \ln(2,743,571) - \ln(171)$  for the results in our analysis. We plotted  $M(n_1)$  for all values of  $n_1$  ranging from **.01** to **1** (Supplementary Figure 1). As that plot demonstrates,  $M(n_1) = 0$  when  $n_1$  is approximately **.31**. Therefore, the DOM occurrence frequency within Healthy Controls is at most 31 percent of the DOM occurrence frequency within the MS patients.

## Supplementary Materials 4

The Prime Motif was present in 104 sequences, which were distributed across 35 patients. As discussed in Section 3.2, the main differentiating factor in the Prime Motif involved the two selective components TNE and DTA. The selective components matched to 204 sequences, which were distributed across 46 individuals. All antibody matches had originated from the IGHV3 germline. The domination of the IGHV3 germline suggested that the Prime Motif might simply be an artifact of IGHV3 expansion among certain motif-matched individuals. In order to disregard this possibility, it was necessarily to analyze IGHV3 expansion across all repertoires. To do so, we first computed the number of non-redundant sequences across each of our 97 repertoires. Non-redundancy was realized by counting each unique CDR3 exactly once, for every processed repertoire. Afterwards, for every repertoire count, we computed the percentage of non-redundant sequences that were assigned to a specific IGHV3 gene. This percentage formed the IGHV3 usage, which we used to rank the repertoires by their levels of IGHV3 expansion. The ordered IGHV3 usage results are displayed in Supplementary Table 5.

The order of the repertoires in Supplementary Table 5 were clearly not dependent on the presence of the Prime Motif. The first five repertoires within the table all originated from Healthy Controls. Two of these five Healthy Controls contained matches to TNE and DTA. Starting with the sixth position, we began see the Prime Motif matching repertoires, which were evenly distributed across the table. Eight of the final ten repertoires in the table matched to components TNE and DTE. Seven of these repertoires also contained matches to the Prime Motif. Thus, neither the Prime Motif nor the selective components were influenced by IGHV3 usage.

## Supplementary Figures

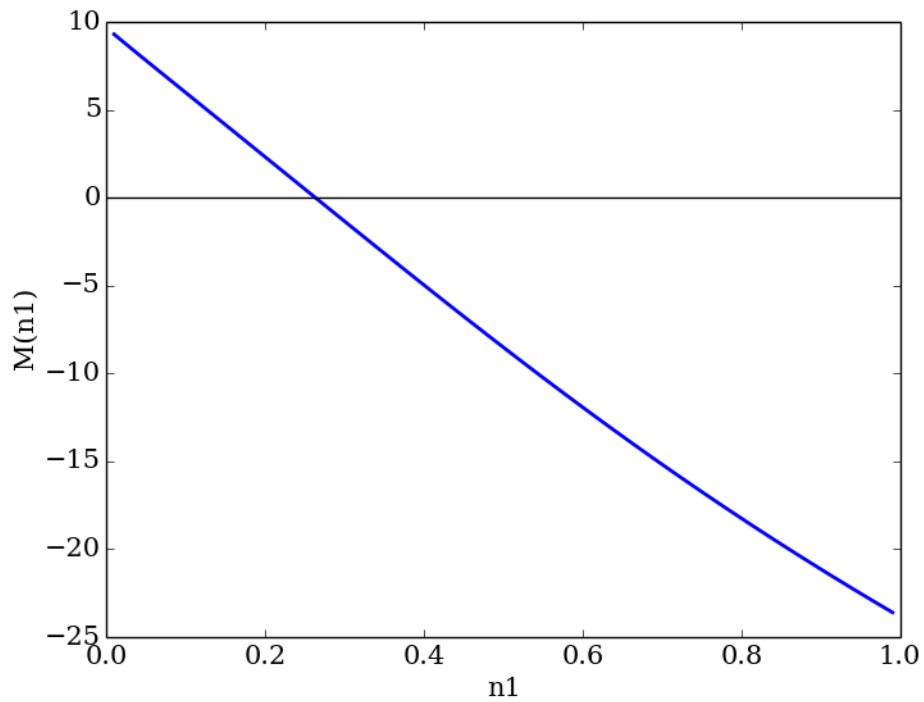

**Figure S1. Unequal Frequency Analysis Plot:** The plot shows  $M(n_1)$  for all values of  $n_1$  ranging from .01 to  $1$ , based on the 171 DOMs obtained from MS patients. According to the plot,  $M(n_1)$  intersects with the x-axis when  $n_1$  is approximately .31.

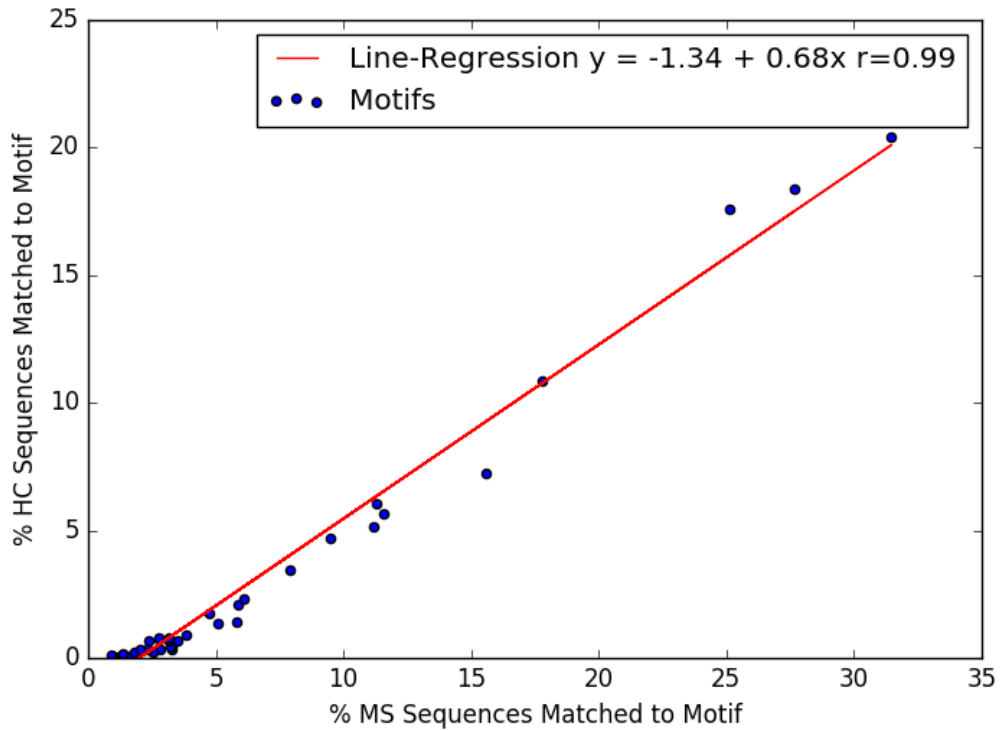

**Figure S2. Percent HOMER Matches to Patient and Control Data.** Each data point in the scatter plot represents a single nucleotide motif outputted by HOMER. The x-axis contains the percentage of MS sequences matched by each motif, while the y-axis contains the percentage of Healthy Control matches. The relationship between the two is strongly linear, as indicated by the regression plot where the coefficient of determination equals .99. A slope coefficient of .68 implies that the discovered HOMER motifs are not strongly over-represented in the MS data.

**Supplementary Table 1**

| <b>Patient ID</b> | <b>Total Sequence Count</b> | <b>Unique CDR3 Count</b> | <b>Diagnosis</b> | <b>Age</b> | <b>Sex</b> | <b>Treatment</b> |
|-------------------|-----------------------------|--------------------------|------------------|------------|------------|------------------|
| MS-1              | 140270                      | 23196                    | RRMS             | 22         | M          | -                |
| MS-2              | 105009                      | 11877                    | RRMS             | 22         | M          | IFNb             |
| MS-3              | 159181                      | 20114                    | RRMS             | 35         | M          | GA               |
| MS-4              | 147638                      | 16329                    | RRMS             | 55         | F          | GA               |
| MS-5              | 144116                      | 14350                    | RRMS             | 38         | M          | IFNb             |
| MS-6              | 154965                      | 28817                    | RRMS             | 38         | M          | -                |
| MS-7              | 125948                      | 9601                     | RRMS             | 57         | F          | -                |
| MS-8              | 151111                      | 19500                    | RRMS             | 48         | M          | IFNb             |
| MS-9              | 128657                      | 11566                    | CIS              | 42         | M          | -                |
| MS-10             | 174883                      | 30437                    | RRMS             | 41         | M          | IFNb             |
| MS-11             | 100397                      | 15568                    | RRMS             | 45         | F          | -                |
| MS-12             | 120701                      | 11099                    | SPMS             | 45         | F          | RTX              |
| MS-13             | 112333                      | 17403                    | RRMS             | 65         | F          | -                |
| MS-14             | 86457                       | 10780                    | RRMS             | 54         | F          | GA               |
| MS-15             | 133502                      | 30729                    | RRMS             | 24         | M          | IFNb             |
| MS-16             | 110124                      | 19232                    | CIS              | 30         | F          | -                |
| MS-17             | 92349                       | 12424                    | RRMS             | 41         | M          | GA               |
| MS-18             | 91068                       | 13973                    | CIS              | 54         | F          | IFNb             |
| MS-19             | 115840                      | 23758                    | RRMS             | 23         | M          | NTZ              |
| MS-20             | 90535                       | 20276                    | RRMS             | 20         | M          | -                |
| MS-21             | 76310                       | 13746                    | RRMS             | 59         | M          | NTZ              |
| MS-22             | 85642                       | 13656                    | RRMS             | 51         | F          | -                |
| MS-23             | 91667                       | 16763                    | RRMS             | 40         | F          | IFNb             |
| MS-24             | 80830                       | 15532                    | CIS              | 59         | F          | -                |
| MS-25             | 82197                       | 9351                     | RRMS             | 60         | F          | NTZ              |
| MS-26             | 94500                       | 20460                    | RRMS             | 33         | M          | GA               |
| MS-27             | 123342                      | 17567                    | RRMS             | 45         | F          | -                |
| MS-28             | 90353                       | 14333                    | RRMS             | 45         | M          | -                |
| MS-29             | 67425                       | 9335                     | RRMS             | 53         | F          | GA               |
| MS-30             | 67250                       | 6846                     | RRMS             | 54         | F          | -                |
| MS-31             | 42359                       | 6049                     | SPMS             | 58         | F          | -                |
| MS-32             | 65648                       | 7708                     | RRMS             | 47         | F          | IFNb             |
| MS-33             | 88987                       | 15253                    | RRMS             | 41         | M          | IFNb             |
| MS-34             | 110277                      | 20375                    | RRMS             | 36         | F          | -                |
| MS-35             | 88528                       | 24424                    | RRMS             | 32         | M          | GA               |
| MS-36             | 169533                      | 23230                    | RRMS             | 38         | M          | GA               |
| MS-37             | 75081                       | 17987                    | RRMS             | 36         | F          | IFNb             |



|       |        |       |      |    |   |      |
|-------|--------|-------|------|----|---|------|
| MS-38 | 78202  | 15732 | RRMS | 40 | F | -    |
| MS-39 | 69820  | 15962 | RRMS | 41 | F | GA   |
| MS-40 | 96619  | 13086 | RRMS | 44 | F | -    |
| MS-41 | 109646 | 19229 | RRMS | 33 | F | IFNb |
| MS-42 | 85661  | 12755 | RRMS | 44 | M | GA   |
| MS-43 | 75513  | 8667  | RRMS | 45 | F | -    |
| MS-44 | 87332  | 12053 | RRMS | 36 | F | IFNb |
| MS-45 | 86150  | 11867 | RRMS | 47 | F | GA   |
| MS-46 | 129040 | 31907 | RRMS | 40 | M | -    |
| MS-47 | 116985 | 21962 | RRMS | 43 | F | GA   |
| MS-48 | 75932  | 17793 | RRMS | 43 | M | GA   |
| MS-49 | 81947  | 9187  | RRMS | 54 | F | -    |
| MS-50 | 87772  | 16641 | RRMS | 41 | F | -    |
| MS-51 | 91379  | 17869 | RRMS | 48 | M | GA   |
| HC-1  | 77013  | 15242 | HC   | 42 | M |      |
| HC-2  | 78334  | 17608 | HC   | 59 | F |      |
| HC-3  | 67813  | 8373  | HC   | 60 | M |      |
| HC-4  | 84824  | 17075 | HC   | 30 | F |      |
| HC-5  | 56960  | 11758 | HC   | 42 | M |      |
| HC-6  | 79502  | 16379 | HC   | 38 | M |      |
| HC-7  | 68389  | 12063 | HC   | 54 | F |      |
| HC-8  | 72647  | 16748 | HC   | 62 | F |      |
| HC-9  | 80926  | 10839 | HC   | 46 | M |      |
| HC-10 | 88889  | 16732 | HC   | 52 | M |      |
| HC-11 | 103474 | 17984 | HC   | 49 | F |      |
| HC-12 | 98008  | 12976 | HC   | 50 | M |      |
| HC-13 | 103292 | 17602 | HC   | 26 | F |      |
| HC-14 | 66398  | 11023 | HC   | 53 | M |      |
| HC-15 | 108962 | 12027 | HC   | 35 | F |      |
| HC-16 | 99223  | 11582 | HC   | 27 | F |      |
| HC-17 | 81008  | 8167  | HC   | 38 | M |      |
| HC-18 | 53661  | 3719  | HC   | 31 | M |      |
| HC-19 | 107595 | 20033 | HC   | 43 | F |      |
| HC-20 | 89043  | 17104 | HC   | 24 | F |      |
| HC-21 | 97954  | 18337 | HC   | 33 | F |      |
| HC-22 | 29733  | 10620 | HC   | 67 | F |      |
| HC-23 | 62154  | 11076 | HC   | 64 | F |      |
| HC-24 | 106375 | 21320 | HC   | 27 | M |      |
| HC-25 | 81323  | 22914 | HC   | 37 | M |      |
| HC-26 | 95559  | 25916 | HC   | 22 | M |      |
| HC-27 | 97963  | 16721 | HC   | 37 | M |      |

|       |        |       |    |    |   |  |
|-------|--------|-------|----|----|---|--|
| HC-28 | 70407  | 9822  | HC | 22 | M |  |
| HC-29 | 70163  | 10336 | HC | 33 | F |  |
| HC-30 | 70081  | 12541 | HC | 21 | M |  |
| HC-31 | 89185  | 19278 | HC | 37 | M |  |
| HC-32 | 90114  | 20401 | HC | 32 | M |  |
| HC-33 | 59092  | 10659 | HC | 26 | F |  |
| HC-34 | 62218  | 7966  | HC | 23 | F |  |
| HC-35 | 108042 | 21800 | HC | 53 | F |  |
| HC-36 | 97131  | 13696 | HC | 58 | M |  |
| HC-37 | 112072 | 18529 | HC | 26 | M |  |
| HC-38 | 130037 | 19360 | HC | 35 | F |  |
| HC-39 | 125611 | 18959 | HC | 37 | M |  |
| HC-40 | 134607 | 22045 | HC | 35 | F |  |
| HC-41 | 105127 | 16864 | HC | 20 | M |  |
| HC-42 | 75584  | 13203 | HC | 24 | M |  |
| HC-43 | 81990  | 12488 | HC | 24 | M |  |
| HC-44 | 69458  | 11740 | HC | 34 | M |  |
| HC-45 | 67719  | 16816 | HC | 40 | F |  |
| HC-46 | 99351  | 14620 | HC | 49 | M |  |

**Sequence Counts Per Patient:** The first column contains the patient id, defined as either belonging to the MS or the HC category. The second column contains the total number of database-stored sequences for each patient; some of these sequences may be identical. The third column contains the number of unique, non-redundant CDR3 sequences associated with each patient. The fourth column contains the type of MS where applicable; patients with clinically isolated syndrome (CIS) were included if MRI and cerebrospinal fluid analysis were consistent with a MS diagnosis. The fifth and sixth columns shows each patient's age and sex. The seventh column shows the patients' therapies (IFNb, interferon beta 1; GA, glatiramer acetate; NTZ, natalizumab; RTX, rituximab); "-" indicates that the patient was not taking an approved disease-modifying therapy for MS.

## Supplementary Table 2

| DOM Motif                 | # of Patient Matches | # of Sequence Matches | %PM Overlap | %PM Non-overlap |
|---------------------------|----------------------|-----------------------|-------------|-----------------|
| (TNE,14),(DTA,6),(CAR,0)  | 35                   | 104                   | 100%        | 0%              |
| (TNE,14),(DTA,6),(YCAR,1) | 35                   | 104                   | 100%        | 0%              |

|                             |    |    |      |    |
|-----------------------------|----|----|------|----|
| (TNEQ,14),(DTA,6),(CAR,0)   | 35 | 99 | 100% | 0% |
| (TNEQ,14),(DTA,6),(YCAR,1)  | 35 | 99 | 100% | 0% |
| (LTNE,15),(DTA,6),(CAR,0)   | 35 | 95 | 100% | 0% |
| (LTNE,15),(DTA,6),(YCAR,1)  | 35 | 95 | 100% | 0% |
| (TNE,14),(VYYCAR,3)         | 34 | 93 | 97%  | 3% |
| (TNE,14),(AVY,4),(CAR,0)    | 34 | 92 | 98%  | 2% |
| (TNE,14),(AVYYCAR,4)        | 34 | 92 | 98%  | 2% |
| (TNE,14),(DTAV,6),(CAR,0)   | 34 | 91 | 100% | 0% |
| (TNE,14),(DTAV,6),(YCAR,1)  | 34 | 91 | 100% | 0% |
| (TNE,14),(TAV,5),(CAR,0)    | 34 | 91 | 100% | 0% |
| (TNE,14),(TAVY,5),(CAR,0)   | 34 | 91 | 100% | 0% |
| (TNE,14),(TAV,5),(YCAR,1)   | 34 | 91 | 100% | 0% |
| (TNE,14),(TAVYYCAR,5)       | 34 | 91 | 100% | 0% |
| (TNEQ,14),(VYYCAR,3)        | 34 | 89 | 98%  | 2% |
| (TNEQ,14),(AVY,4),(CAR,0)   | 34 | 88 | 100% | 0% |
| (TNEQ,14),(AVYYCAR,4)       | 34 | 88 | 100% | 0% |
| (TNEQ,14),(DTAV,6),(CAR,0)  | 34 | 88 | 100% | 0% |
| (TNEQ,14),(DTAV,6),(YCAR,1) | 34 | 88 | 100% | 0% |
| (TNEQ,14),(TAV,5),(CAR,0)   | 34 | 88 | 100% | 0% |
| (TNEQ,14),(TAVY,5),(CAR,0)  | 34 | 88 | 100% | 0% |
| (TNEQ,14),(TAV,5),(YCAR,1)  | 34 | 88 | 100% | 0% |
| (TNEQ,14),(TAVYYCAR,5)      | 34 | 88 | 100% | 0% |
| (TNEQP,14),(CAR,0)          | 34 | 87 | 98%  | 2% |
| (TNEQP,14),(YCAR,1)         | 34 | 87 | 98%  | 2% |
| (LTNE,15),(VYYCAR,3)        | 34 | 85 | 98%  | 2% |
| (LTNE,15),(AVY,4),(CAR,0)   | 34 | 84 | 100% | 0% |
| (LTNE,15),(AVYYCAR,4)       | 34 | 84 | 100% | 0% |
| (LTNE,15),(DTAV,6),(CAR,0)  | 34 | 84 | 100% | 0% |
| (LTNE,15),(DTAV,6),(YCAR,1) | 34 | 84 | 100% | 0% |
| (LTNE,15),(TAV,5),(CAR,0)   | 34 | 84 | 100% | 0% |
| (LTNE,15),(TAVY,5),(CAR,0)  | 34 | 84 | 100% | 0% |
| (LTNE,15),(TAV,5),(YCAR,1)  | 34 | 84 | 100% | 0% |
| (LTNE,15),(TAVYYCAR,5)      | 34 | 84 | 100% | 0% |
| (TNEQPE,14),(CAR,0)         | 34 | 83 | 98%  | 2% |
| (TNEQPE,14),(YCAR,1)        | 34 | 83 | 98%  | 2% |
| (RDN,24),(TNE,14),(CAR,0)   | 34 | 83 | 98%  | 2% |
| (RDN,24),(TNE,14),(YCAR,1)  | 34 | 83 | 98%  | 2% |
| (SRDN,25),(TNE,14),(CAR,0)  | 34 | 83 | 98%  | 2% |
| (SRDN,25),(TNE,14),(YCAR,1) | 34 | 83 | 98%  | 2% |
| (LTNEQP,15),(CAR,0)         | 34 | 81 | 98%  | 2% |
| (LTNEQP,15),(YCAR,1)        | 34 | 81 | 98%  | 2% |

|                              |    |    |     |     |
|------------------------------|----|----|-----|-----|
| (RDN,24),(TNEQ,14),(CAR,0)   | 34 | 79 | 98% | 2%  |
| (RDN,24),(TNEQ,14),(YCAR,1)  | 34 | 79 | 98% | 2%  |
| (SRDN,25),(TNEQ,14),(CAR,0)  | 34 | 79 | 98% | 2%  |
| (SRDN,25),(TNEQ,14),(YCAR,1) | 34 | 79 | 98% | 2%  |
| (LTNEQPE,15),(CAR,0)         | 34 | 78 | 98% | 2%  |
| (LTNEQPE,15),(YCAR,1)        | 34 | 78 | 98% | 2%  |
| (RDN,24),(LTNE,15),(CAR,0)   | 34 | 77 | 98% | 2%  |
| (RDN,24),(LTNE,15),(YCAR,1)  | 34 | 77 | 98% | 2%  |
| (SRDN,25),(LTNE,15),(CAR,0)  | 34 | 77 | 98% | 2%  |
| (SRDN,25),(LTNE,15),(YCAR,1) | 34 | 77 | 98% | 2%  |
| (TNE,14),(PES,10),(CAR,0)    | 34 | 70 | 98% | 2%  |
| (TNE,14),(PES,10),(YCAR,1)   | 34 | 70 | 98% | 2%  |
| (TNEQPES,14),(CAR,0)         | 34 | 68 | 98% | 2%  |
| (TNEQPES,14),(YCAR,1)        | 34 | 68 | 98% | 2%  |
| (LTNE,15),(PES,10),(CAR,0)   | 34 | 67 | 98% | 2%  |
| (LTNE,15),(PES,10),(YCAR,1)  | 34 | 67 | 98% | 2%  |
| (LTNEQPES,15),(CAR,0)        | 34 | 66 | 98% | 2%  |
| (LTNEQPES,15),(YCAR,1)       | 34 | 66 | 98% | 2%  |
| (SKN,21),(YLT,16),(PES,10)   | 33 | 62 | 37% | 63% |
| (YLTN,16),(DTA,6),(CAR,0)    | 32 | 87 | 94% | 6%  |
| (YLTN,16),(DTA,6),(YCAR,1)   | 32 | 87 | 94% | 6%  |
| (KNT,20),(YLT,16),(EQP,12)   | 32 | 69 | 37% | 63% |
| (SKN,21),(YLT,16),(EQP,12)   | 32 | 62 | 40% | 60% |
| (KNT,20),(YLT,16),(PES,10)   | 32 | 62 | 38% | 62% |
| (SKN,21),(YLT,16),(EQPE,12)  | 32 | 58 | 41% | 59% |
| (YLTN,16),(VYYCAR,3)         | 31 | 79 | 91% | 9%  |
| (YLTN,16),(AVY,4),(CAR,0)    | 31 | 77 | 93% | 7%  |
| (YLTN,16),(AVYYCAR,4)        | 31 | 77 | 93% | 7%  |
| (YLTN,16),(DTAV,6),(CAR,0)   | 31 | 77 | 93% | 7%  |
| (YLTN,16),(DTAV,6),(YCAR,1)  | 31 | 77 | 93% | 7%  |
| (YLTN,16),(TAV,5),(CAR,0)    | 31 | 77 | 93% | 7%  |
| (YLTN,16),(TAVY,5),(CAR,0)   | 31 | 77 | 93% | 7%  |
| (YLTN,16),(TAV,5),(YCAR,1)   | 31 | 77 | 93% | 7%  |
| (YLTN,16),(TAVYYCAR,5)       | 31 | 77 | 93% | 7%  |
| (LYLTN,17),(CAR,0)           | 31 | 76 | 93% | 7%  |
| (LYLTN,17),(YCAR,1)          | 31 | 76 | 93% | 7%  |
| (TLYLT,18),(EQP,12)          | 31 | 71 | 36% | 64% |
| (KNT,20),(TNEQP,14)          | 31 | 71 | 39% | 61% |
| (YLT,16),(QPE,11),(CAR,0)    | 31 | 71 | 91% | 9%  |
| (YLT,16),(QPE,11),(YCAR,1)   | 31 | 71 | 91% | 9%  |
| (KNT,20),(LTNEQP,15)         | 31 | 70 | 38% | 62% |

|                              |    |    |     |     |
|------------------------------|----|----|-----|-----|
| (NTL,19),(TNEQP,14)          | 31 | 69 | 39% | 61% |
| (NTL,19),(LTNEQP,15)         | 31 | 68 | 38% | 62% |
| (NTLYLT,19),(EQP,12)         | 31 | 68 | 36% | 64% |
| (YLTN,16),(QPE,11),(CAR,0)   | 31 | 68 | 95% | 5%  |
| (YLTN,16),(QPE,11),(YCAR,1)  | 31 | 68 | 95% | 5%  |
| (KNT,20),(YLTNEQP,16)        | 31 | 67 | 38% | 62% |
| (SKN,21),(TNEQP,14)          | 31 | 65 | 43% | 57% |
| (SKN,21),(LTNEQP,15)         | 31 | 64 | 42% | 58% |
| (SKN,21),(TNEQPE,14)         | 31 | 60 | 45% | 55% |
| (SKNT,21),(YLT,16),(EQP,12)  | 31 | 60 | 41% | 59% |
| (SKN,21),(YLTNEQP,16)        | 31 | 60 | 41% | 59% |
| (SKN,21),(YLT,16),(QPES,11)  | 31 | 60 | 38% | 62% |
| (SKN,21),(LTNEQPE,15)        | 31 | 59 | 44% | 56% |
| (KNT,20),(YLT,16),(EQPE,12)  | 31 | 59 | 42% | 58% |
| (SKNT,21),(YLT,16),(PES,10)  | 31 | 59 | 38% | 62% |
| (SKN,21),(YLTN,16),(PES,10)  | 31 | 58 | 39% | 61% |
| (SKN,21),(LYLT,17),(PES,10)  | 31 | 57 | 36% | 64% |
| (SKN,21),(TNE,14),(PES,10)   | 31 | 57 | 45% | 55% |
| (SKN,21),(LTNE,15),(PES,10)  | 31 | 56 | 44% | 56% |
| (SKNT,21),(YLT,16),(EQPE,12) | 31 | 56 | 42% | 58% |
| (SKN,21),(YLTNEQPE,16)       | 31 | 56 | 42% | 58% |
| (RDN,24),(YLTN,16),(CAR,0)   | 30 | 74 | 91% | 9%  |
| (RDN,24),(YLTN,16),(YCAR,1)  | 30 | 74 | 91% | 9%  |
| (SRDN,25),(YLTN,16),(CAR,0)  | 30 | 74 | 91% | 9%  |
| (SRDN,25),(YLTN,16),(YCAR,1) | 30 | 74 | 91% | 9%  |
| (LYLTNE,17),(YCAR,1)         | 30 | 72 | 98% | 2%  |
| (LYLTNE,17),(CAR,0)          | 30 | 72 | 98% | 2%  |
| (YLT,16),(EQP,12),(CAR,0)    | 30 | 72 | 94% | 6%  |
| (YLT,16),(EQP,12),(YCAR,1)   | 30 | 72 | 94% | 6%  |
| (TLY,18),(TNEQP,14)          | 30 | 70 | 38% | 62% |
| (TLYLTNEQP,18)               | 30 | 69 | 37% | 63% |
| (LYLTNEQ,17),(CAR,0)         | 30 | 69 | 98% | 2%  |
| (LYLTNEQ,17),(YCAR,1)        | 30 | 69 | 98% | 2%  |
| (YLT,16),(EQPE,12),(CAR,0)   | 30 | 69 | 94% | 6%  |
| (YLT,16),(EQPE,12),(YCAR,1)  | 30 | 69 | 94% | 6%  |
| (YLTNEQP,16),(CAR,0)         | 30 | 69 | 98% | 2%  |
| (YLTNEQP,16),(YCAR,1)        | 30 | 69 | 98% | 2%  |
| (NTLY,19),(TNEQP,14)         | 30 | 67 | 38% | 62% |
| (NTLYLTNEQP,19)              | 30 | 66 | 37% | 63% |
| (LYLT,17),(QPE,11),(CAR,0)   | 30 | 66 | 90% | 10% |
| (LYLT,17),(QPE,11),(YCAR,1)  | 30 | 66 | 90% | 10% |

|                              |    |    |     |     |
|------------------------------|----|----|-----|-----|
| (YLTNEQPE,16),(CAR,0)        | 30 | 66 | 98% | 2%  |
| (YLTNEQPE,16),(YCAR,1)       | 30 | 66 | 98% | 2%  |
| (YLT,16),(PES,10),(CAR,0)    | 30 | 65 | 86% | 14% |
| (YLT,16),(PES,10),(YCAR,1)   | 30 | 65 | 86% | 14% |
| (TLYLT,18),(PES,10)          | 30 | 64 | 39% | 61% |
| (TLYLT,18),(QPE,11)          | 30 | 64 | 39% | 61% |
| (SKNT,21),(TNEQP,14)         | 30 | 62 | 43% | 57% |
| (SKNT,21),(LTNEQP,15)        | 30 | 61 | 42% | 58% |
| (NTLYLT,19),(PES,10)         | 30 | 61 | 39% | 61% |
| (NTLYLT,19),(QPE,11)         | 30 | 61 | 39% | 61% |
| (YLT,16),(QPES,11),(CAR,0)   | 30 | 61 | 90% | 10% |
| (YLT,16),(QPES,11),(YCAR,1)  | 30 | 61 | 90% | 10% |
| (TLYLT,18),(EQPE,12)         | 30 | 60 | 41% | 59% |
| (KNT,20),(TNEQPE,14)         | 30 | 60 | 45% | 55% |
| (KNT,20),(YLT,16),(QPES,11)  | 30 | 60 | 40% | 60% |
| (YLTN,16),(PES,10),(CAR,0)   | 30 | 60 | 93% | 7%  |
| (YLTN,16),(PES,10),(YCAR,1)  | 30 | 60 | 93% | 7%  |
| (KNT,20),(LTNEQPE,15)        | 30 | 59 | 44% | 56% |
| (KNT,20),(TNE,14),(YCA,1)    | 30 | 59 | 59% | 41% |
| (KNT,20),(LTNE,15),(YCA,1)   | 30 | 58 | 58% | 42% |
| (KNT,20),(TNE,14),(YYCA,2)   | 30 | 58 | 58% | 42% |
| (NTL,19),(TNEQPE,14)         | 30 | 58 | 44% | 56% |
| (KNT,20),(TNEQ,14),(YCA,1)   | 30 | 58 | 60% | 40% |
| (TLY,18),(TNE,14),(YCA,1)    | 30 | 58 | 56% | 44% |
| (SKNT,21),(YLTNEQP,16)       | 30 | 58 | 43% | 57% |
| (KNT,20),(YLTN,16),(PES,10)  | 30 | 58 | 41% | 59% |
| (YLTN,16),(QPES,11),(CAR,0)  | 30 | 58 | 94% | 6%  |
| (SKN,21),(YLTN,16),(QPES,11) | 30 | 58 | 39% | 61% |
| (YLTN,16),(QPES,11),(YCAR,1) | 30 | 58 | 94% | 6%  |
| (SKNT,21),(YLT,16),(QPES,11) | 30 | 58 | 39% | 61% |
| (KNT,20),(LTNE,15),(YYCA,2)  | 30 | 57 | 57% | 43% |
| (NTL,19),(LTNEQPE,15)        | 30 | 57 | 43% | 57% |
| (TLYLTNE,18),(YCA,1)         | 30 | 57 | 56% | 44% |
| (NTLYLT,19),(EQPE,12)        | 30 | 57 | 42% | 58% |
| (KNT,20),(TNEQ,14),(YYCA,2)  | 30 | 57 | 59% | 41% |
| (SKNT,21),(TNEQPE,14)        | 30 | 57 | 45% | 55% |
| (TLY,18),(TNE,14),(YYCA,2)   | 30 | 57 | 56% | 44% |
| (KNT,20),(YLTNEQPE,16)       | 30 | 57 | 43% | 57% |
| (KNTLYLT,20),(PES,10)        | 30 | 56 | 39% | 61% |
| (SKNT,21),(LTNEQPE,15)       | 30 | 56 | 44% | 56% |
| (TLYLTNE,18),(YYCA,2)        | 30 | 56 | 55% | 45% |

|                             |    |    |     |     |
|-----------------------------|----|----|-----|-----|
| (KNT,20),(TNE,14),(PES,10)  | 30 | 56 | 46% | 54% |
| (SKN,21),(TNEQPES,14)       | 30 | 56 | 46% | 54% |
| (KNT,20),(LTNE,15),(PES,10) | 30 | 55 | 45% | 55% |
| (SKN,21),(LTNEQPES,15)      | 30 | 55 | 45% | 55% |
| (SKNT,21),(YLTNEQPE,16)     | 30 | 54 | 44% | 56% |

**Discovered DOM Motifs:** All 171 discovered DOMs are listed in this table. The first column represents each DOM in a parenthesis notation where (S,x) represents a non-gapped subsequence S that is located x amino acids to the left of the CDR3. The second column contains the total number of MS patient matches to the DOM. The third column the total number of sequence matches to the DOM. The fourth column illustrates the percentage of matching sequences that also match to the master motif. The fifth column illustrates the percentage of matching sequences that do not match to the master motif. The Prime Motif, which matches the maximum of sequences and the maximum number of patients, appears in the first row of the table.

### Supplementary Table 3

| Patient ID | V-Gene        | # Sequence Matches |
|------------|---------------|--------------------|
| MS-5       | IGHV3-48      | 10                 |
| MS-15      | IGHV3-7       | 9                  |
| MS-20      | IGHV3-48      | 7                  |
| MS-11      | IGHV3-7       | 5                  |
| MS-13      | IGHV3-30/33rn | 5                  |
| MS-26      | IGHV3-74      | 5                  |
| MS-8       | IGHV3-23      | 4                  |
| MS-19      | IGHV3-30/33rn | 4                  |
| MS-27      | IGHV3-7       | 4                  |
| MS-28      | IGHV3-53/66   | 4                  |
| MS-1       | IGHV3-72      | 3                  |
| MS-2       | IGHV3-11      | 3                  |
| MS-6       | IGHV3-30/33rn | 3                  |
| MS-12      | IGHV3-21      | 3                  |
| MS-17      | IGHV3-21      | 3                  |
| MS-23      | IGHV3-53/66   | 3                  |
| MS-25      | IGHV3-72      | 3                  |
| MS-3       | IGHV3-11      | 2                  |
| MS-9       | IGHV3-21      | 2                  |

|       |               |   |
|-------|---------------|---|
| MS-10 | IGHV3-53/66   | 2 |
| MS-14 | IGHV3-30/33rn | 2 |
| MS-16 | IGHV3-74      | 2 |
| MS-18 | IGHV3-21      | 2 |
| MS-30 | IGHV3-30/33rn | 2 |
| MS-31 | IGHV3-30/33rn | 2 |
| MS-4  | IGHV3-21      | 1 |
| MS-7  | IGHV3-53/66   | 1 |
| MS-21 | IGHV3-7       | 1 |
| MS-22 | IGHV3-30/33rn | 1 |
| MS-24 | IGHV3-48      | 1 |
| MS-32 | IGHV3-7       | 1 |
| MS-40 | IGHV3-30/33rn | 1 |
| MS-42 | IGHV3-48      | 1 |
| MS-44 | IGHV3-53/66   | 1 |
| MS-46 | IGHV3-74      | 1 |

**Prime Motif Patient Matches:** All 104 sequence matches to the Prime Motif are grouped by patient in this table. The first column lists the ids of the patients with matching sequences to the prime motif. The second column lists the most frequently occurring v-gene among the matching sequences. The final column contains the total number of matching sequences associated with an individual patient. A total of 35 patients are present in the table. All matching v-genes are IGHV3.

#### Supplementary Table 4

| Patient ID | V-Gene        | # Sequence Matches |
|------------|---------------|--------------------|
| MS-15      | IGHV3-23      | 14                 |
| MS-5       | IGHV3-48      | 13                 |
| MS-20      | IGHV3-48      | 12                 |
| MS-12      | IGHV3-23      | 11                 |
| MS-11      | IGHV3-7       | 10                 |
| MS-14      | IGHV3-48      | 10                 |
| MS-1       | IGHV3-7       | 9                  |
| MS-8       | IGHV3-23      | 9                  |
| MS-23      | IGHV3-53/66   | 9                  |
| MS-18      | IGHV3-30/33rn | 7                  |
| MS-24      | IGHV3-23      | 7                  |



|       |               |   |
|-------|---------------|---|
| MS-26 | IGHV3-30/33rn | 7 |
| MS-3  | IGHV3-11      | 6 |
| MS-9  | IGHV3-23      | 6 |
| MS-13 | IGHV3-30/33rn | 6 |
| MS-19 | IGHV3-23      | 6 |
| MS-25 | IGHV3-72      | 6 |
| MS-17 | IGHV3-21      | 5 |
| MS-21 | IGHV3-53/66   | 5 |
| MS-27 | IGHV3-7       | 5 |
| MS-28 | IGHV3-53/66   | 5 |
| MS-2  | IGHV3-11      | 4 |
| MS-6  | IGHV3-30/33rn | 4 |
| MS-10 | IGHV3-7       | 4 |
| MS-22 | IGHV3-30/33rn | 4 |
| MS-7  | IGHV3-53/66   | 3 |
| MS-16 | IGHV3-74      | 3 |
| MS-30 | IGHV3-30/33rn | 3 |
| MS-31 | IGHV3-30/33rn | 3 |
| MS-4  | IGHV3-21      | 2 |
| MS-29 | IGHV3-23      | 2 |
| MS-32 | IGHV3-7       | 2 |
| HC-10 | IGHV3-15      | 2 |
| HC-4  | IGHV3-72      | 1 |
| MS-38 | IGHV3-23      | 1 |
| MS-40 | IGHV3-30/33rn | 1 |
| MS-42 | IGHV3-48      | 1 |
| MS-44 | IGHV3-53/66   | 1 |
| MS-46 | IGHV3-74      | 1 |
| MS-49 | IGHV3-23      | 1 |
| MS-50 | IGHV3-73      | 1 |
| HC-15 | IGHV3-23      | 1 |
| HC-20 | IGHV3-64      | 1 |
| HC-24 | IGHV3-7       | 1 |
| HC-29 | IGHV3-7       | 1 |
| HC-42 | IGHV3-7       | 1 |

**Selective Component Patient Matches:** 46 individuals match the selective components TNE and DTA. 11 of these individuals do not match the Prime Motif. Each row in the table represents a patient match to the selective components, as indicated by the patient id in the first column. A total of 7 Healthy Control matches are marked in green. The four MS patients that do not contain the Prime Motif are marked in orange. The count of selective component sequence matches per patient is listed in column three. These sequence counts range from values of one to fourteen. The second column lists the most frequently occurring v-gene among the matching sequences. All matching sequences contain the IGHV3 variable region.

### Supplementary Table 5

| Patient ID | %IGHV3 Usage |
|------------|--------------|
| HC-34      | 62.06%       |
| HC-41      | 57.05%       |
| HC-29      | 54.92%       |
| HC-42      | 52.81%       |
| HC-23      | 52.29%       |
| MS-42      | 51.88%       |
| MS-34      | 51.63%       |
| HC-46      | 51.46%       |
| MS-39      | 51.41%       |
| HC-21      | 51.31%       |
| MS-23      | 50.44%       |
| HC-13      | 50.11%       |
| HC-30      | 50.08%       |
| MS-7       | 50.07%       |
| MS-16      | 49.48%       |
| HC-37      | 49.35%       |
| HC-5       | 49.24%       |
| MS-41      | 49.17%       |
| MS-25      | 48.90%       |
| HC-36      | 48.65%       |
| HC-44      | 48.51%       |
| HC-35      | 48.49%       |
| HC-40      | 48.42%       |
| HC-19      | 48.41%       |
| HC-28      | 48.30%       |

|       |        |
|-------|--------|
| HC-27 | 48.03% |
| HC-38 | 47.92% |
| MS-22 | 47.74% |
| MS-20 | 47.74% |
| MS-37 | 47.53% |
| MS-33 | 47.29% |
| HC-22 | 47.13% |
| MS-46 | 47.07% |
| HC-10 | 46.88% |
| MS-13 | 46.80% |
| HC-26 | 46.80% |
| HC-8  | 46.61% |
| HC-14 | 46.49% |
| MS-1  | 46.39% |
| HC-31 | 46.36% |
| MS-35 | 46.19% |
| HC-17 | 46.08% |
| MS-11 | 46.00% |
| MS-29 | 45.97% |
| HC-3  | 45.88% |
| MS-12 | 45.86% |
| MS-5  | 45.61% |
| MS-26 | 45.57% |
| MS-47 | 45.54% |
| MS-38 | 45.43% |
| HC-24 | 45.38% |
| MS-19 | 45.36% |
| HC-16 | 45.32% |
| HC-39 | 45.30% |
| MS-48 | 44.88% |
| MS-8  | 44.18% |
| MS-14 | 43.96% |
| HC-1  | 43.90% |
| HC-2  | 43.41% |
| HC-32 | 43.20% |
| MS-50 | 43.20% |
| HC-43 | 42.99% |
| HC-12 | 42.93% |
| MS-15 | 42.92% |
| MS-40 | 42.78% |
| HC-18 | 42.69% |

|       |        |
|-------|--------|
| HC-6  | 42.52% |
| HC-20 | 42.31% |
| MS-49 | 42.17% |
| HC-4  | 42.01% |
| HC-11 | 41.61% |
| MS-4  | 41.57% |
| MS-10 | 41.49% |
| MS-18 | 41.42% |
| HC-25 | 41.42% |
| MS-30 | 41.29% |
| HC-15 | 40.90% |
| MS-2  | 40.40% |
| HC-33 | 40.29% |
| MS-21 | 40.23% |
| MS-44 | 40.16% |
| MS-31 | 40.05% |
| MS-43 | 40.03% |
| MS-27 | 39.85% |
| MS-45 | 39.73% |
| MS-32 | 38.73% |
| HC-9  | 38.65% |
| HC-7  | 38.49% |
| MS-17 | 38.33% |
| MS-51 | 38.14% |
| HC-45 | 36.89% |
| MS-3  | 36.73% |
| MS-36 | 36.45% |
| MS-9  | 35.09% |
| MS-24 | 34.65% |
| MS-6  | 34.54% |
| MS-28 | 33.95% |

**IGHV3 Percent Usage Per Patient:** Column one contains the patient id. Column two contains the percentage of non-redundant sequences within each patient that may be categorized as IGHV3. Non-redundancy is defined by the presence of a unique CDR3. The table is sorted by the v-gene percentage in column two. Certain rows within the table are colored by match type. MS patients matching to the Prime motif are colored in blue. Healthy Controls matching to the selective components TNE and DTA are colored green. MS patients not matching the Prime Motif but matching TNE and DTA are colored in orange. All remaining rows are colored white. The color distribution in the table does not appear related to v-gene usage.

**Supplementary Table 6**

| <b>Patient ID</b> | <b># Sequence Matches</b> |
|-------------------|---------------------------|
| MS-5              | 10                        |
| MS-15             | 9                         |
| MS-20             | 7                         |
| MS-26             | 5                         |
| MS-13             | 5                         |
| MS-27             | 4                         |
| MS-28             | 4                         |
| MS-8              | 4                         |
| MS-11             | 4                         |
| MS-23             | 3                         |
| MS-6              | 3                         |
| MS-2              | 3                         |
| MS-1              | 3                         |
| MS-12             | 3                         |
| MS-17             | 3                         |
| MS-19             | 3                         |
| MS-25             | 2                         |
| MS-3              | 2                         |
| MS-9              | 2                         |
| MS-10             | 2                         |
| MS-16             | 2                         |
| MS-14             | 2                         |
| MS-18             | 2                         |
| MS-31             | 2                         |
| MS-30             | 2                         |
| MS-40             | 1                         |
| MS-42             | 1                         |
| MS-44             | 1                         |
| MS-46             | 1                         |
| MS-32             | 1                         |
| MS-24             | 1                         |
| MS-22             | 1                         |
| MS-21             | 1                         |
| MS-7              | 1                         |
| MS-4              | 1                         |

**Indel Requirement Prime Motif Patient Matches:** All 101 sequences that comply with the indel requirement have been grouped by patient in this table. Sequence counts that differ from the original Prime Motif matching counterparts have highlighted in yellow. Three Prime Motif matching sequences from three different patients do not comply with the indel requirement.

**Supplementary Table 7**

| Patient ID | Run ID | Lane ID | Primer Set 1 | Primer Set 2 | Motif Detected? |
|------------|--------|---------|--------------|--------------|-----------------|
| MS-1       | 3      | 2       |              | IgG29        | YES             |
| MS-1       | 4      | 1       | IgM83        | IgG29        | YES             |
| MS-1       | 4      | 2       | IgM83        | IgG29        | YES             |
| MS-1       | 4      | 2       | IgM83        | IgG29        | YES             |
| MS-1       | 4      | 2       | IgM83        | IgG29        | YES             |
| MS-1       | 6      | 1       | IgM83        |              | YES             |
| MS-2       | 1      | 1       | IgM83        | IgG29        | YES             |
| MS-2       | 1      | 2       | IgM83        | IgG29        | YES             |
| MS-3       | 1      | 1       | IgM83        | IgG29        | YES             |
| MS-3       | 1      | 2       | IgM83        | IgG29        | YES             |
| MS-4       | 1      | 1       | IgM83        | IgG29        | YES             |
| MS-4       | 1      | 2       | IgM83        | IgG29        | YES             |
| MS-5       | 1      | 1       | IgM83        | IgG29        | YES             |
| MS-5       | 1      | 2       | IgM83        | IgG29        | YES             |
| MS-6       | 1      | 1       | IgM83        | IgG29        | YES             |
| MS-6       | 1      | 2       | IgM83        | IgG29        | YES             |
| MS-7       | 4      | 1       | IgM83        | IgG29        | YES             |
| MS-7       | 4      | 2       | IgM83        | IgG29        | YES             |
| MS-8       | 1      | 1       | IgM83        | IgG29        | YES             |
| MS-8       | 1      | 2       | IgM83        | IgG29        | YES             |
| MS-9       | 1      | 1       | IgM83        | IgG29        | YES             |
| MS-9       | 1      | 2       | IgM83        | IgG29        | YES             |
| MS-10      | 1      | 1       | IgM83        | IgG29        | YES             |
| MS-10      | 1      | 2       | IgM83        | IgG29        | YES             |
| MS-11      | 2      | 1       | IgM83        | IgG29        | YES             |
| MS-11      | 2      | 2       | IgM83        | IgG29        | YES             |
| MS-11      | 5      | 1       |              | IgG29        | YES             |
| MS-12      | 4      | 1       | IgM83        | IgG29        | YES             |
| MS-12      | 4      | 2       | IgM83        | IgG29        | YES             |
| MS-13      | 4      | 1       | IgM83        | IgG29        | YES             |
| MS-13      | 4      | 2       | IgM83        | IgG29        | YES             |

|       |   |   |       |       |     |
|-------|---|---|-------|-------|-----|
| MS-14 | 2 | 1 | IgM83 | IgG29 | YES |
| MS-14 | 2 | 2 | IgM83 | IgG29 | YES |
| MS-14 | 5 | 1 |       | IgG29 | YES |
| MS-15 | 2 | 1 | IgM83 | IgG29 | YES |
| MS-15 | 2 | 2 | IgM83 | IgG29 | YES |
| MS-15 | 5 | 1 |       | IgG29 | YES |
| MS-16 | 2 | 1 | IgM83 | IgG29 | YES |
| MS-16 | 2 | 2 | IgM83 | IgG29 | YES |
| MS-16 | 5 | 1 |       | IgG29 | YES |
| MS-17 | 2 | 1 | IgM83 | IgG29 | YES |
| MS-17 | 2 | 2 | IgM83 | IgG29 | YES |
| MS-17 | 5 | 1 |       | IgG29 | YES |
| MS-18 | 2 | 1 | IgM83 | IgG29 | YES |
| MS-18 | 2 | 2 | IgM83 | IgG29 | YES |
| MS-18 | 5 | 1 |       | IgG29 | YES |
| MS-19 | 4 | 1 | IgM83 | IgG29 | YES |
| MS-19 | 4 | 2 | IgM83 | IgG29 | YES |
| MS-20 | 2 | 1 | IgM83 | IgG29 | YES |
| MS-20 | 2 | 2 | IgM83 | IgG29 | YES |
| MS-20 | 5 | 1 |       | IgG29 | YES |
| MS-21 | 2 | 1 | IgM83 | IgG29 | YES |
| MS-21 | 2 | 2 | IgM83 | IgG29 | YES |
| MS-21 | 5 | 1 |       | IgG29 | YES |
| MS-22 | 3 | 1 | IgM83 | IgG29 | YES |
| MS-22 | 3 | 2 | IgM83 | IgG29 | YES |
| MS-22 | 5 | 1 |       | IgG29 | YES |
| MS-23 | 3 | 1 | IgM83 | IgG29 | YES |
| MS-23 | 3 | 2 | IgM83 | IgG29 | YES |
| MS-23 | 5 | 1 |       | IgG29 | YES |
| MS-24 | 3 | 1 | IgM83 | IgG29 | YES |
| MS-24 | 3 | 2 | IgM83 | IgG29 | YES |
| MS-24 | 5 | 1 |       | IgG29 | YES |
| MS-25 | 4 | 1 | IgM83 | IgG29 | YES |
| MS-25 | 4 | 2 | IgM83 | IgG29 | YES |
| MS-26 | 3 | 1 | IgM83 | IgG29 | YES |
| MS-26 | 3 | 2 | IgM83 | IgG29 | YES |
| MS-26 | 5 | 1 |       | IgG29 | YES |
| MS-27 | 4 | 1 | IgM83 | IgG29 | YES |
| MS-27 | 4 | 2 | IgM83 | IgG29 | YES |
| MS-28 | 3 | 1 | IgM83 | IgG29 | YES |
| MS-28 | 3 | 2 | IgM83 | IgG29 | YES |
| MS-28 | 5 | 1 |       | IgG29 | YES |

|       |   |   |       |       |     |
|-------|---|---|-------|-------|-----|
| MS-29 | 3 | 1 | IgM83 | IgG29 | NO  |
| MS-29 | 3 | 2 | IgM83 | IgG29 | NO  |
| MS-29 | 5 | 1 |       | IgG29 | NO  |
| MS-30 | 4 | 1 | IgM83 | IgG29 | YES |
| MS-30 | 4 | 2 | IgM83 | IgG29 | YES |
| MS-31 | 3 | 1 | IgM83 | IgG29 | YES |
| MS-31 | 3 | 2 | IgM83 | IgG29 | YES |
| MS-31 | 5 | 1 |       | IgG29 | YES |
| MS-32 | 3 | 1 | IgM83 | IgG29 | YES |
| MS-32 | 3 | 2 | IgM83 | IgG29 | YES |
| MS-32 | 5 | 1 |       | IgG29 | YES |
| MS-33 | 6 | 1 | IgM83 | IgG29 | NO  |
| MS-33 | 6 | 2 | IgM83 | IgG29 | NO  |
| MS-34 | 6 | 1 | IgM83 | IgG29 | NO  |
| MS-34 | 6 | 2 | IgM83 | IgG29 | NO  |
| MS-35 | 7 | 1 | IgM83 | IgG29 | NO  |
| MS-35 | 7 | 2 | IgM83 | IgG29 | NO  |
| MS-36 | 9 | 1 | IgM83 | IgG29 | NO  |
| MS-36 | 9 | 2 | IgM83 | IgG29 | NO  |
| MS-37 | 7 | 1 | IgM83 | IgG29 | NO  |
| MS-37 | 7 | 2 | IgM83 | IgG29 | NO  |
| MS-38 | 7 | 1 | IgM83 | IgG29 | NO  |
| MS-38 | 7 | 2 | IgM83 | IgG29 | NO  |
| MS-39 | 7 | 1 | IgM83 | IgG29 | NO  |
| MS-39 | 7 | 2 | IgM83 | IgG29 | NO  |
| MS-40 | 9 | 1 | IgM83 | IgG29 | YES |
| MS-40 | 9 | 2 | IgM83 | IgG29 | YES |
| MS-41 | 7 | 1 | IgM83 | IgG29 | NO  |
| MS-41 | 7 | 2 | IgM83 | IgG29 | NO  |
| MS-42 | 7 | 1 | IgM83 | IgG29 | YES |
| MS-42 | 7 | 2 | IgM83 | IgG29 | YES |
| MS-43 | 9 | 1 | IgM83 | IgG29 | NO  |
| MS-43 | 9 | 2 | IgM83 | IgG29 | NO  |
| MS-44 | 8 | 1 | IgM83 | IgG29 | YES |
| MS-44 | 8 | 2 | IgM83 | IgG29 | YES |
| MS-45 | 8 | 1 | IgM83 | IgG29 | NO  |
| MS-45 | 8 | 2 | IgM83 | IgG29 | NO  |
| MS-46 | 9 | 1 | IgM83 | IgG29 | YES |
| MS-46 | 9 | 2 | IgM83 | IgG29 | YES |
| MS-47 | 8 | 1 | IgM83 | IgG29 | NO  |
| MS-47 | 8 | 2 | IgM83 | IgG29 | NO  |
| MS-48 | 8 | 1 | IgM83 | IgG29 | NO  |



|       |   |   |       |       |    |
|-------|---|---|-------|-------|----|
| MS-48 | 8 | 2 | IgM83 | IgG29 | NO |
| MS-49 | 9 | 1 | IgM83 | IgG29 | NO |
| MS-49 | 9 | 2 | IgM83 | IgG29 | NO |
| MS-50 | 9 | 1 | IgM83 | IgG29 | NO |
| MS-50 | 9 | 2 | IgM83 | IgG29 | NO |
| MS-51 | 9 | 1 | IgM83 | IgG29 | NO |
| MS-51 | 9 | 2 | IgM83 | IgG29 | NO |

**MS Patient Batch Runs:** This table contains the separate sequencing runs and samples for all the MS patients, along with whether the Prime Motif had been identified in a particular patient or not. Based on the table, every MS patient that did not contain the Prime Motif shared its run-lane combinations with at-least one patient in whom the motif was present.
